# Supplementary material for: Formation of water-in-oil microemulsions within a hydrophobic deep eutectic solvent
Source: Royal Society of Chemistry journal article supplement (doi:10.1039/d0cp06716d), 2021-01-01
Supplement: d0cp06716d1.pdf [file d0cp06716d1.pdf]

## **Electronic Supplementary Information (ESI)**

### **Formation of water-in-oil microemulsions within a hydrophobic deep eutectic solvent**

Divya Dhingra, Kamalakanta Behera, Bhawna and Siddharth Pandey\*

\*To whom correspondence should be addressed.

E-mail: sipandey@chemistry.iitd.ac.in, Phone: +91-11-26596503, Fax: +91-11-26581102

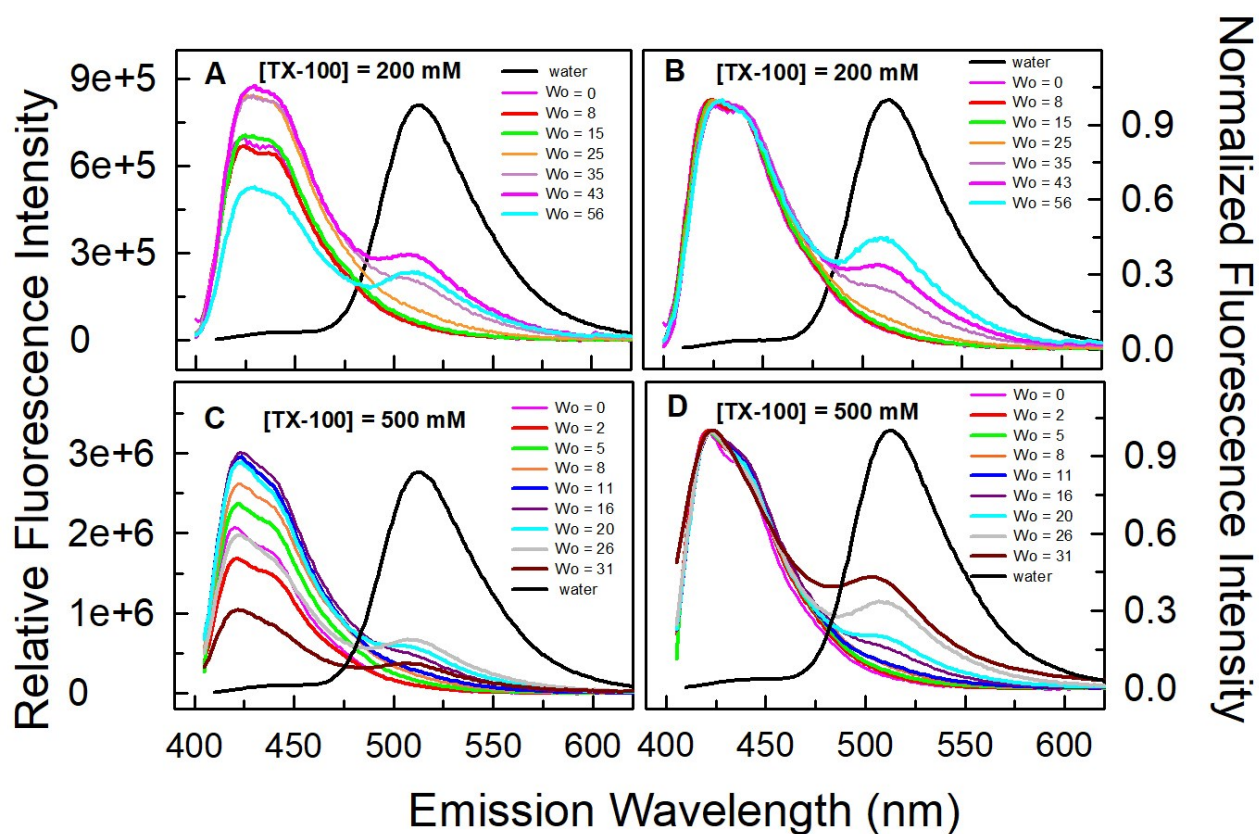

**Figure S1.** Relative (panels A and C) and normalized (panels B and D) fluorescence emission spectra of pyranine (10  $\mu\text{M}$ ,  $\lambda_{\text{ex}} = 390 \text{ nm}$ , slits: excitation/emission = 2/2 nm) dissolved within TX-100 (300mM)/TBAC-DA and TX-100 (500mM)/TBAC-DA systems at different water loadings ( $W_0$ ), respectively. Fluorescence emission spectrum of pyranine in water is added in each panel for reference.
